# Supplementary material for: The beneficiation of asphalt waste through conversion into an efficient activated carbon adsorbent for diazinon pesticide, optimized through response surface methodology
Source: Royal Society of Chemistry journal article supplement (doi:10.1039/d4su00196f), 2024-01-01
Supplement: d4su00196f1.pdf [file d4su00196f1.pdf]

## Supplementary information

### The beneficiation of asphalt waste through conversion into an efficient activated carbon adsorbent for Diazinon Pesticide, optimized through Response Surface Methodology

Robert O. Gembo<sup>a,b</sup>, Sebusi Odisitse<sup>b</sup>, Titus A.M Msagati<sup>b</sup>, and Cecil. K. King'ondeu<sup>a,\*</sup>

<sup>a</sup> Department of Chemical and Forensic Sciences, Botswana International University of Science and Technology, Palapye, Botswana.

<sup>b</sup> Institute for Nanotechnology and Water Sustainability, College of Science, Engineering and Technology, University of South Africa, Florida 1709, Roodepoort, Johannesburg, South Africa.

\* Corresponding author: Cecil K. King'ondeu. Email address: [kingonduc@biust.ac.bw](mailto:kingonduc@biust.ac.bw).

**Table 1S.** Benefits and drawbacks of the reported treatment techniques for pesticides (1-3).

| Method                    | Advantages                                                                                                                                                                                                              | Disadvantages                                                                                                                             |
|---------------------------|-------------------------------------------------------------------------------------------------------------------------------------------------------------------------------------------------------------------------|-------------------------------------------------------------------------------------------------------------------------------------------|
| Fenton oxidation          | Efficient at treating industrial-scale pesticide-contaminated wastewater, facilitates degradation and mineralization of pesticides. and proven and established technology                                               | Formation of sludge occurs, necessitating operation under acidic conditions at pH 3, mandating the neutralization of pH.                  |
| Chlorination              | Straightforward maintenance and operation, cost-effective. readily accessible                                                                                                                                           | Use of extremely corrosive chemicals raises concerns about odor and taste, generation of by-products.                                     |
| Photochemical degradation | Absence of sludge generation, rapid treatment process, utilization of solar energy, well-established technology                                                                                                         | Generation of by-products, high energy and cost requirements, challenges with UV penetration                                              |
| Biological treatment      | Cost-effective, demonstrates high efficiency, environmentally friendly, requires no regeneration, achieves complete mineralization of contaminants to CO <sub>2</sub> and H <sub>2</sub> O without intermediate buildup | Breakdown and deterioration of biosorbents, and ineffectiveness in the absence of conducive environmental conditions for microbial growth |
| Membrane filtration       | Requires small space for set up, and it is highly effective                                                                                                                                                             | Significant investment and operational expenses, challenges with membrane fouling                                                         |

**Table 2S.** Synthesis parameters and their levels.

| Levels |
|--------|
|--------|

| Parameters             | Units |     |     |     |
|------------------------|-------|-----|-----|-----|
| Activation temperature | °C    | 500 | 600 | 700 |
| Activation time        | min   | 45  | 60  | 75  |
| Activation ratio       | g/g   | 1   | 2   | 3   |

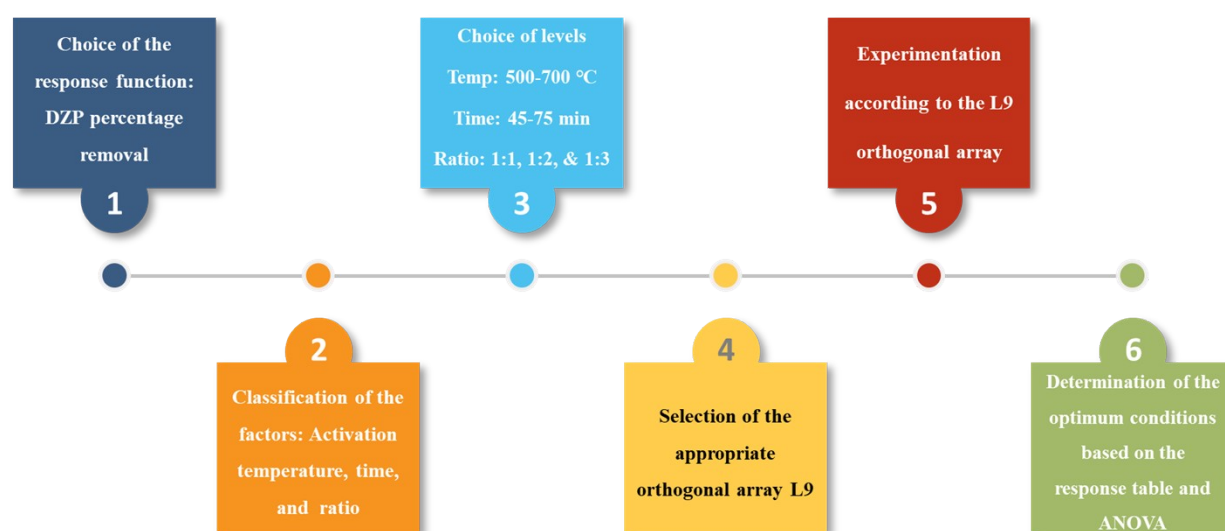

**Figure 1S.** The robust design methodology according to Taguchi for the preparation of AC.

**Table 3S.** Experimental ranges and levels of independent test variables

| Parameters               | Units | Ranges and levels |     |     |     |           |
|--------------------------|-------|-------------------|-----|-----|-----|-----------|
|                          |       | $-\alpha$         | -1  | 0   | +1  | $+\alpha$ |
| Adsorbent dosage         | mg    | 23                | 30  | 40  | 50  | 57        |
| DP initial concentration | mg/L  | 66                | 100 | 150 | 200 | 234       |
| pH                       |       | 1                 | 3   | 5.5 | 8   | 10        |

**Table 4S.** Design structure and matrix of DP adsorption experiment by CCD

| Run | Coded values |         |    | Actual values |         |    |
|-----|--------------|---------|----|---------------|---------|----|
|     | Adsorbent    | Initial | pH | Adsorbent     | Initial | pH |

|    | dosage<br>(mg) | concentration<br>(mg/L) |       | dosage (mg) | concentration<br>(mg/L) |     |
|----|----------------|-------------------------|-------|-------------|-------------------------|-----|
| 1  | -1             | -1                      | -1    | 30          | 100                     | 3   |
| 2  | 1              | -1                      | -1    | 50          | 100                     | 3   |
| 3  | -1             | 1                       | -1    | 30          | 200                     | 3   |
| 4  | 1              | 1                       | -1    | 50          | 200                     | 3   |
| 5  | -1             | -1                      | 1     | 30          | 100                     | 8   |
| 6  | 1              | -1                      | 1     | 50          | 100                     | 8   |
| 7  | -1             | 1                       | 1     | 30          | 200                     | 8   |
| 8  | 1              | 1                       | 1     | 50          | 200                     | 8   |
| 9  | -1.68          | 0                       | 0     | 23          | 150                     | 5.5 |
| 10 | 1.68           | 0                       | 0     | 57          | 150                     | 5.5 |
| 11 | 0              | -1.68                   | 0     | 40          | 66                      | 5.5 |
| 12 | 0              | 1.68                    | 0     | 40          | 234                     | 5.5 |
| 13 | 0              | 0                       | -1.68 | 40          | 150                     | 1   |
| 14 | 0              | 0                       | 1.68  | 40          | 150                     | 10  |
| 15 | 0              | 0                       | 0     | 40          | 150                     | 5.5 |
| 16 | 0              | 0                       | 0     | 40          | 150                     | 5.5 |
| 17 | 0              | 0                       | 0     | 40          | 150                     | 5.5 |
| 18 | 0              | 0                       | 0     | 40          | 150                     | 5.5 |
| 19 | 0              | 0                       | 0     | 40          | 150                     | 5.5 |
| 20 | 0              | 0                       | 0     | 40          | 150                     | 5.5 |

**Table 5S.** Different forms of kinetics models

| Model               | Equation                                                            | Plot                  | Parameters                                                                                                 |
|---------------------|---------------------------------------------------------------------|-----------------------|------------------------------------------------------------------------------------------------------------|
| Pseudo first order  | $Log(q_e - q_t) = log q_e - \left(\frac{K_1}{2.303}\right)t$        | $Log(q_e - q_t) vs t$ | $q_e$ = Adsorption capacity at time t (mg/g)<br>$K_1$ = Rate constant of pseudo-first order ( $min^{-1}$ ) |
| Pseudo second order | $\frac{t}{q_t} = \frac{1}{K_2 q_e^2} + \left(\frac{1}{q_e}\right)t$ | $\frac{t}{q_t} vs t$  | $K_2$ = Rate constant of pseudo-second order ( $g/mg \cdot min^{-1}$ )                                     |

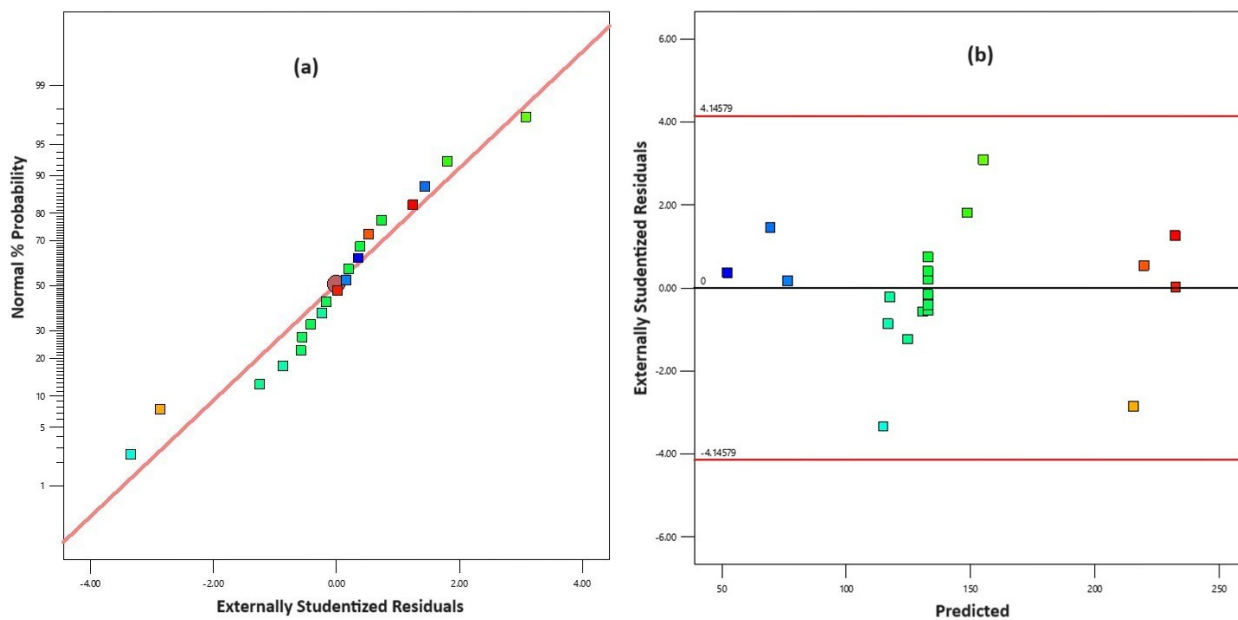

**Figure 2S.** Adequacy plots of the quadratic model.

## References

1. Zieliński B, Miądlicki P, Przepiórski J. Development of activated carbon for removal of pesticides from water: case study. *Sci Rep* [Internet]. 2022;12(1):1–14.
2. Domingues E, Gomes J, Quina MJ, Quinta-Ferreira RM, Martins RC. Detoxification of olive mill wastewaters by fenton's process. *Catalysts*. 2018;8(12):662.
3. Brienza M, Katsoyiannis IA. Sulfate radical technologies as tertiary treatment for the removal of emerging contaminants from wastewater. *Sustainability*. 2017;9(9):1604.
